# Supplementary material for: Brominated Skeletal Components of the Marine Demosponges, Aplysina cavernicola and Ianthella basta: Analytical and Biochemical Investigations
Source: MDPI journal article supplement (doi:10.3390/md11041271), 2013-04-17
Supplement: s2 [file s2]

marinedrugs-11-01271-s001.mol
  corina  04151405103D 1   1.00000     0.00000 
CORINA 3.49 0023  12.04.2013
 40 43  0  0  0  0  0  0  0  0999 V2000
   -0.1771    1.1299    0.0357 N   0  0  0  0  0  0  0  0  0  0  0  0
   -1.5124   -0.8870   -0.3260 C   0  0  0  0  0  0  0  0  0  0  0  0
   -0.1085   -0.3285   -0.0851 C   0  0  0  0  0  0  0  0  0  0  0  0
   -2.8447   -2.9685   -0.6929 C   0  0  0  0  0  0  0  0  0  0  0  0
   -1.4407   -2.4101   -0.4520 C   0  0  0  0  0  0  0  0  0  0  0  0
    0.9466    1.8418    0.2521 C   0  0  0  0  0  0  0  0  0  0  0  0
    0.8775    3.3111    0.3737 C   0  0  0  0  0  0  0  0  0  0  0  0
   -0.1937    4.0273    0.2922 N   0  0  0  0  0  0  0  0  0  0  0  0
    2.0527    4.2393    0.6226 C   0  0  0  0  0  0  0  0  0  0  0  0
    1.4643    5.6205    0.2727 C   0  0  0  0  0  0  0  0  0  0  0  0
    0.0556    5.4110    0.4566 O   0  0  0  0  0  0  0  0  0  0  0  0
    1.7733    5.9730   -1.1515 C   0  0  0  0  0  0  0  0  0  0  0  0
    1.7858    7.2459   -1.5358 C   0  0  0  0  0  0  0  0  0  0  0  0
    1.5201    8.3100   -0.5521 C   0  0  0  0  0  0  0  0  0  0  0  0
    1.5968    8.0523    0.7533 C   0  0  0  0  0  0  0  0  0  0  0  0
    1.9836    6.6773    1.2350 C   0  0  0  0  0  0  0  0  0  0  0  0
    3.4075    6.5862    1.3141 O   0  0  0  0  0  0  0  0  0  0  0  0
    1.2187    9.4172    2.0063 Br  0  0  0  0  0  0  0  0  0  0  0  0
    1.1959    9.5598   -0.9776 O   0  0  0  0  0  0  0  0  0  0  0  0
   -0.0516    9.7102   -1.6580 C   0  0  0  0  0  0  0  0  0  0  0  0
    2.1439    7.6889   -3.3390 Br  0  0  0  0  0  0  0  0  0  0  0  0
    2.0171    1.2738    0.3471 O   0  0  0  0  0  0  0  0  0  0  0  0
   -2.7760   -4.4269   -0.8136 N   0  0  0  0  0  0  0  0  0  0  0  0
   -3.8998   -5.1388   -1.0301 C   0  0  0  0  0  0  0  0  0  0  0  0
   -3.8306   -6.6081   -1.1517 C   0  0  0  0  0  0  0  0  0  0  0  0
   -2.7599   -7.3242   -1.0693 N   0  0  0  0  0  0  0  0  0  0  0  0
   -3.0105   -8.7089   -1.2203 O   0  0  0  0  0  0  0  0  0  0  0  0
   -4.3124   -8.8496   -1.8076 C   0  0  0  0  0  0  0  0  0  0  0  0
   -5.0076   -7.5375   -1.3886 C   0  0  0  0  0  0  0  0  0  0  0  0
   -4.9702   -4.5708   -1.1251 O   0  0  0  0  0  0  0  0  0  0  0  0
   -5.0446  -10.0462   -1.2205 C   0  0  0  0  0  0  0  0  0  0  0  0
   -4.4974  -11.3238   -1.8049 C   0  0  0  0  0  0  0  0  0  0  0  0
   -4.0614  -11.3525   -3.0643 C   0  0  0  0  0  0  0  0  0  0  0  0
   -4.0840  -10.1299   -3.8862 C   0  0  0  0  0  0  0  0  0  0  0  0
   -4.2150   -8.9432   -3.3009 C   0  0  0  0  0  0  0  0  0  0  0  0
   -3.5936  -12.5146   -3.5923 O   0  0  0  0  0  0  0  0  0  0  0  0
   -2.2042  -12.5641   -3.9226 C   0  0  0  0  0  0  0  0  0  0  0  0
   -3.9273  -10.2479   -5.7670 Br  0  0  0  0  0  0  0  0  0  0  0  0
   -4.4288  -12.8902   -0.7478 Br  0  0  0  0  0  0  0  0  0  0  0  0
   -6.4375   -9.9449   -1.5229 O   0  0  0  0  0  0  0  0  0  0  0  0
  2  3  1  0      
  3  1  1  0      
  4  5  1  0      
  5  2  1  0      
  1  6  1  0      
  6  7  1  0      
  7  8  2  0      
  7  9  1  0      
 11  8  1  0      
 10 12  1  0      
 12 13  2  0      
 13 14  1  0      
 14 15  2  0      
 15 16  1  0      
 16 10  1  0      
 16 17  1  0      
 15 18  1  0      
 14 19  1  0      
 19 20  1  0      
 13 21  1  0      
 10  9  1  0      
 10 11  1  0      
  6 22  2  0      
  4 23  1  0      
 23 24  1  0      
 24 25  1  0      
 25 26  2  0      
 26 27  1  0      
 29 25  1  0      
 24 30  2  0      
 28 31  1  0      
 31 32  1  0      
 32 33  2  0      
 33 34  1  0      
 34 35  2  0      
 35 28  1  0      
 33 36  1  0      
 36 37  1  0      
 34 38  1  0      
 32 39  1  0      
 31 40  1  0      
 28 27  1  0      
 28 29  1  0      
M  END
$$$$
