# Supplementary material for: Brominated Skeletal Components of the Marine Demosponges, Aplysina cavernicola and Ianthella basta: Analytical and Biochemical Investigations
Source: MDPI journal article supplement (doi:10.3390/md11041271), 2013-04-17
Supplement: s3 [file s3]

marinedrugs-11-01271-s001.mol
  ChemDraw03101420592D

 40 43  0  0  0  0  0  0  0  0999 V2000
   -1.9681   -2.5322    0.0000 N   0  0  0  0  0  0  0  0  0  0  0  0
   -0.5391   -2.5322    0.0000 C   0  0  0  0  0  0  0  0  0  0  0  0
   -1.2536   -2.1197    0.0000 C   0  0  0  0  0  0  0  0  0  0  0  0
    0.8898   -2.5322    0.0000 C   0  0  0  0  0  0  0  0  0  0  0  0
    0.1753   -2.1197    0.0000 C   0  0  0  0  0  0  0  0  0  0  0  0
   -2.6826   -2.1197    0.0000 C   0  0  0  0  0  0  0  0  0  0  0  0
   -2.8961   -1.3228    0.0000 C   0  0  0  0  0  0  0  0  0  0  0  0
   -3.7211   -1.3228    0.0000 N   0  0  0  0  0  0  0  0  0  0  0  0
   -2.6411   -0.5382    0.0000 C   0  0  0  0  0  0  0  0  0  0  0  0
   -3.3086   -0.0533    0.0000 C   0  0  0  0  0  0  0  0  0  0  0  0
   -3.9760   -0.5382    0.0000 O   0  0  0  0  0  0  0  0  0  0  0  0
   -2.5941    0.3592    0.0000 C   0  0  0  0  0  0  0  0  0  0  0  0
   -2.5941    1.1842    0.0000 C   0  0  0  0  0  0  0  0  0  0  0  0
   -3.3086    1.5967    0.0000 C   0  0  0  0  0  0  0  0  0  0  0  0
   -4.0231    1.1842    0.0000 C   0  0  0  0  0  0  0  0  0  0  0  0
   -4.0231    0.3592    0.0000 C   0  0  0  0  0  0  0  0  0  0  0  0
   -4.7375   -0.0533    0.0000 O   0  0  0  0  0  0  0  0  0  0  0  0
   -4.7375    1.5967    0.0000 Br  0  0  0  0  0  0  0  0  0  0  0  0
   -3.3086    2.4217    0.0000 O   0  0  0  0  0  0  0  0  0  0  0  0
   -2.5941    2.8342    0.0000 C   0  0  0  0  0  0  0  0  0  0  0  0
   -2.0107    1.7676    0.0000 Br  0  0  0  0  0  0  0  0  0  0  0  0
   -3.0951   -2.8342    0.0000 O   0  0  0  0  0  0  0  0  0  0  0  0
    1.6867   -2.3187    0.0000 N   0  0  0  0  0  0  0  0  0  0  0  0
    2.0992   -1.6042    0.0000 C   0  0  0  0  0  0  0  0  0  0  0  0
    2.8961   -1.3907    0.0000 C   0  0  0  0  0  0  0  0  0  0  0  0
    3.7211   -1.3907    0.0000 N   0  0  0  0  0  0  0  0  0  0  0  0
    3.9760   -0.6061    0.0000 O   0  0  0  0  0  0  0  0  0  0  0  0
    3.3086   -0.1212    0.0000 C   0  0  0  0  0  0  0  0  0  0  0  0
    2.6411   -0.6061    0.0000 C   0  0  0  0  0  0  0  0  0  0  0  0
    1.6867   -0.8898    0.0000 O   0  0  0  0  0  0  0  0  0  0  0  0
    4.0230    0.2913    0.0000 C   0  0  0  0  0  0  0  0  0  0  0  0
    4.0230    1.1163    0.0000 C   0  0  0  0  0  0  0  0  0  0  0  0
    3.3086    1.5288    0.0000 C   0  0  0  0  0  0  0  0  0  0  0  0
    2.5941    1.1163    0.0000 C   0  0  0  0  0  0  0  0  0  0  0  0
    2.5941    0.2913    0.0000 C   0  0  0  0  0  0  0  0  0  0  0  0
    3.3086    2.3538    0.0000 O   0  0  0  0  0  0  0  0  0  0  0  0
    4.0230    2.7663    0.0000 C   0  0  0  0  0  0  0  0  0  0  0  0
    1.8796    1.5288    0.0000 Br  0  0  0  0  0  0  0  0  0  0  0  0
    4.7375    1.5288    0.0000 Br  0  0  0  0  0  0  0  0  0  0  0  0
    4.7375   -0.1212    0.0000 O   0  0  0  0  0  0  0  0  0  0  0  0
  2  3  1  0      
  3  1  1  0      
  4  5  1  0      
  5  2  1  0      
  1  6  1  0      
  6  7  1  0      
  7  8  2  0      
  7  9  1  0      
 11  8  1  0      
 10 12  1  0      
 12 13  2  0      
 13 14  1  0      
 14 15  2  0      
 15 16  1  0      
 16 10  1  0      
 16 17  1  1      
 15 18  1  0      
 14 19  1  0      
 19 20  1  0      
 13 21  1  0      
 10  9  1  1      
 10 11  1  6      
  6 22  2  0      
  4 23  1  0      
 23 24  1  0      
 24 25  1  0      
 25 26  2  0      
 26 27  1  0      
 29 25  1  0      
 24 30  2  0      
 28 31  1  0      
 31 32  1  0      
 32 33  2  0      
 33 34  1  0      
 34 35  2  0      
 35 28  1  0      
 33 36  1  0      
 36 37  1  0      
 34 38  1  0      
 32 39  1  0      
 31 40  1  6      
 28 27  1  1      
 28 29  1  6      
M  END
