# Supplementary material for: Brominated Skeletal Components of the Marine Demosponges, Aplysina cavernicola and Ianthella basta: Analytical and Biochemical Investigations
Source: MDPI journal article supplement (doi:10.3390/md11041271), 2013-04-17
Supplement: s4 [file s4]

marinedrugs-11-01271-s002.mol
  corina  04151405103D 1   1.00000     0.00000 
CORINA 3.49 0023  12.04.2013
 54 58  0  0  0  0  0  0  0  0999 V2000
   -0.0187    1.5266    0.0104 C   0  0  0  0  0  0  0  0  0  0  0  0
    0.0021   -0.0041    0.0020 C   0  0  0  0  0  0  0  0  0  0  0  0
   -1.3905   -0.4953   -0.0992 N   0  0  0  0  0  0  0  0  0  0  0  0
   -1.7355   -1.0232   -1.3119 C   0  0  0  0  0  0  0  0  0  0  0  0
   -0.9394   -1.0216   -2.2305 O   0  0  0  0  0  0  0  0  0  0  0  0
   -3.0819   -1.5950   -1.4951 C   0  0  0  0  0  0  0  0  0  0  0  0
   -3.5193   -2.0745   -2.8520 C   0  0  0  0  0  0  0  0  0  0  0  0
   -2.9568   -3.4434   -3.1361 C   0  0  0  0  0  0  0  0  0  0  0  0
   -2.5846   -4.2720   -2.0954 C   0  0  0  0  0  0  0  0  0  0  0  0
   -2.8082   -3.8636   -4.4459 C   0  0  0  0  0  0  0  0  0  0  0  0
   -2.3262   -5.1288   -4.7185 C   0  0  0  0  0  0  0  0  0  0  0  0
   -1.9984   -5.9822   -3.6765 C   0  0  0  0  0  0  0  0  0  0  0  0
   -2.1035   -5.5379   -2.3623 C   0  0  0  0  0  0  0  0  0  0  0  0
    0.6793   -7.4922   -4.3191 C   0  0  0  0  0  0  0  0  0  0  0  0
   -0.6412   -7.6461   -4.7151 C   0  0  0  0  0  0  0  0  0  0  0  0
   -0.9245   -8.2627   -5.9349 C   0  0  0  0  0  0  0  0  0  0  0  0
    0.1069   -8.7301   -6.7319 C   0  0  0  0  0  0  0  0  0  0  0  0
    1.4177   -8.5933   -6.3155 C   0  0  0  0  0  0  0  0  0  0  0  0
    1.6998   -7.9886   -5.1051 C   0  0  0  0  0  0  0  0  0  0  0  0
   -1.6489   -7.2646   -3.9050 O   0  0  0  0  0  0  0  0  0  0  0  0
   -2.2051   -5.4528   -5.7417 H   0  0  0  0  0  0  0  0  0  0  0  0
   -2.2145   -8.4050   -6.3407 O   0  0  0  0  0  0  0  0  0  0  0  0
   -0.1128   -9.2016   -7.6783 H   0  0  0  0  0  0  0  0  0  0  0  0
   -1.8073   -6.1844   -1.5494 H   0  0  0  0  0  0  0  0  0  0  0  0
   -2.0138   -0.4463    0.6423 H   0  0  0  0  0  0  0  0  0  0  0  0
   -3.8876   -1.6847   -0.4882 N   0  0  0  0  0  0  0  0  0  0  0  0
   -5.1810   -2.2337   -0.6631 O   0  0  0  0  0  0  0  0  0  0  0  0
    1.3984    2.0440   -0.0003 C   0  0  0  0  0  0  0  0  0  0  0  0
    2.4490    1.1970    0.2958 C   0  0  0  0  0  0  0  0  0  0  0  0
    3.7501    1.6757    0.2870 C   0  0  0  0  0  0  0  0  0  0  0  0
    3.9939    3.0113   -0.0270 C   0  0  0  0  0  0  0  0  0  0  0  0
    2.9371    3.8526   -0.3308 C   0  0  0  0  0  0  0  0  0  0  0  0
    1.6420    3.3671   -0.3198 C   0  0  0  0  0  0  0  0  0  0  0  0
    5.2676    3.4877   -0.0345 O   0  0  0  0  0  0  0  0  0  0  0  0
    3.1238    4.8877   -0.5760 H   0  0  0  0  0  0  0  0  0  0  0  0
    3.1250   -7.9107   -4.6270 C   0  0  0  0  0  0  0  0  0  0  0  0
    3.5431   -6.4669   -4.5128 C   0  0  0  0  0  0  0  0  0  0  0  0
    4.5992   -6.0922   -3.5527 C   0  0  0  0  0  0  0  0  0  0  0  0
    5.0945   -6.9301   -2.8247 O   0  0  0  0  0  0  0  0  0  0  0  0
    5.0117   -4.7977   -3.4929 N   0  0  0  0  0  0  0  0  0  0  0  0
    6.0546   -4.5002   -2.4921 C   0  0  0  0  0  0  0  0  0  0  0  0
    6.7112   -3.1620   -2.8219 C   0  0  0  0  0  0  0  0  0  0  0  0
    6.1654   -2.0944   -1.9097 C   0  0  0  0  0  0  0  0  0  0  0  0
    5.6109   -2.4358   -0.6911 C   0  0  0  0  0  0  0  0  0  0  0  0
    2.9817   -5.5652   -5.2496 N   0  0  0  0  0  0  0  0  0  0  0  0
    6.2183   -0.7719   -2.3046 C   0  0  0  0  0  0  0  0  0  0  0  0
    5.7278    0.2208   -1.4809 C   0  0  0  0  0  0  0  0  0  0  0  0
    5.1909   -0.1141   -0.2480 C   0  0  0  0  0  0  0  0  0  0  0  0
    5.1188   -1.4460    0.1372 C   0  0  0  0  0  0  0  0  0  0  0  0
    4.7790    0.8542    0.6055 O   0  0  0  0  0  0  0  0  0  0  0  0
    4.6779   -1.7075    1.0878 H   0  0  0  0  0  0  0  0  0  0  0  0
    5.7635    1.2531   -1.7960 H   0  0  0  0  0  0  0  0  0  0  0  0
    4.6435   -4.1124   -4.0724 H   0  0  0  0  0  0  0  0  0  0  0  0
    1.9693   -5.9318   -6.1691 O   0  0  0  0  0  0  0  0  0  0  0  0
  1  2  1  0      
  2  3  1  0      
  3  4  1  0      
  4  5  2  0      
  4  6  1  0      
  6  7  1  0      
  7  8  1  0      
  8  9  2  0      
  8 10  1  0      
 10 11  2  0      
 11 12  1  0      
 12 13  2  0      
 13  9  1  0      
 14 15  1  0      
 15 16  2  0      
 16 17  1  0      
 17 18  2  0      
 18 19  1  0      
 19 14  2  0      
 15 20  1  0      
 12 20  1  0      
 11 21  1  0      
 16 22  1  0      
 17 23  1  0      
 13 24  1  0      
  3 25  1  0      
  6 26  2  0      
 26 27  1  0      
  1 28  1  0      
 28 29  1  0      
 29 30  2  0      
 30 31  1  0      
 31 32  2  0      
 32 33  1  0      
 33 28  2  0      
 31 34  1  0      
 32 35  1  0      
 19 36  1  0      
 36 37  1  0      
 37 38  1  0      
 38 39  2  0      
 38 40  1  0      
 40 41  1  0      
 41 42  1  0      
 42 43  1  0      
 43 44  1  0      
 37 45  2  0      
 43 46  2  0      
 46 47  1  0      
 47 48  2  0      
 48 49  1  0      
 49 44  2  0      
 48 50  1  0      
 50 30  1  0      
 49 51  1  0      
 47 52  1  0      
 40 53  1  0      
 45 54  1  0      
M  END
$$$$
