# Supplementary material for: Brominated Skeletal Components of the Marine Demosponges, Aplysina cavernicola and Ianthella basta: Analytical and Biochemical Investigations
Source: MDPI journal article supplement (doi:10.3390/md11041271), 2013-04-17
Supplement: s5 [file s5]

marinedrugs-11-01271-s002.mol
  ChemDraw03101421002D

 54 58  0  0  0  0  0  0  0  0999 V2000
   -1.4680   -2.1862    0.0000 C   0  0  0  0  0  0  0  0  0  0  0  0
   -1.4680   -3.0113    0.0000 C   0  0  0  0  0  0  0  0  0  0  0  0
   -0.7536   -3.4238    0.0000 N   0  0  0  0  0  0  0  0  0  0  0  0
   -0.0391   -3.0113    0.0000 C   0  0  0  0  0  0  0  0  0  0  0  0
   -0.0391   -2.1862    0.0000 O   0  0  0  0  0  0  0  0  0  0  0  0
    0.6754   -3.4238    0.0000 C   0  0  0  0  0  0  0  0  0  0  0  0
    1.3898   -3.0113    0.0000 C   0  0  0  0  0  0  0  0  0  0  0  0
    1.3898   -2.1862    0.0000 C   0  0  0  0  0  0  0  0  0  0  0  0
    0.6754   -1.7737    0.0000 C   0  0  0  0  0  0  0  0  0  0  0  0
    2.1043   -1.7737    0.0000 C   0  0  0  0  0  0  0  0  0  0  0  0
    2.1043   -0.9487    0.0000 C   0  0  0  0  0  0  0  0  0  0  0  0
    1.3898   -0.5363    0.0000 C   0  0  0  0  0  0  0  0  0  0  0  0
    0.6754   -0.9487    0.0000 C   0  0  0  0  0  0  0  0  0  0  0  0
    2.1001    1.7737    0.0000 C   0  0  0  0  0  0  0  0  0  0  0  0
    2.1001    0.9487    0.0000 C   0  0  0  0  0  0  0  0  0  0  0  0
    2.8146    0.5363    0.0000 C   0  0  0  0  0  0  0  0  0  0  0  0
    3.5290    0.9487    0.0000 C   0  0  0  0  0  0  0  0  0  0  0  0
    3.5290    1.7737    0.0000 C   0  0  0  0  0  0  0  0  0  0  0  0
    2.8146    2.1862    0.0000 C   0  0  0  0  0  0  0  0  0  0  0  0
    1.3856    0.5363    0.0000 O   0  0  0  0  0  0  0  0  0  0  0  0
    2.8188   -0.5363    0.0000 H   0  0  0  0  0  0  0  0  0  0  0  0
    2.8146   -0.2888    0.0000 O   0  0  0  0  0  0  0  0  0  0  0  0
    4.3259    0.7352    0.0000 H   0  0  0  0  0  0  0  0  0  0  0  0
   -0.1215   -0.7352    0.0000 H   0  0  0  0  0  0  0  0  0  0  0  0
   -0.7536   -4.2488    0.0000 H   0  0  0  0  0  0  0  0  0  0  0  0
    0.6754   -4.2488    0.0000 N   0  0  0  0  0  0  0  0  0  0  0  0
    1.3898   -4.6612    0.0000 O   0  0  0  0  0  0  0  0  0  0  0  0
   -2.1825   -1.7737    0.0000 C   0  0  0  0  0  0  0  0  0  0  0  0
   -2.1825   -0.9487    0.0000 C   0  0  0  0  0  0  0  0  0  0  0  0
   -2.8970   -0.5362    0.0000 C   0  0  0  0  0  0  0  0  0  0  0  0
   -3.6114   -0.9487    0.0000 C   0  0  0  0  0  0  0  0  0  0  0  0
   -3.6114   -1.7737    0.0000 C   0  0  0  0  0  0  0  0  0  0  0  0
   -2.8970   -2.1862    0.0000 C   0  0  0  0  0  0  0  0  0  0  0  0
   -4.3259   -0.5363    0.0000 O   0  0  0  0  0  0  0  0  0  0  0  0
   -4.3259   -2.1862    0.0000 H   0  0  0  0  0  0  0  0  0  0  0  0
    2.8146    3.0113    0.0000 C   0  0  0  0  0  0  0  0  0  0  0  0
    2.1001    3.4238    0.0000 C   0  0  0  0  0  0  0  0  0  0  0  0
    1.3856    3.0113    0.0000 C   0  0  0  0  0  0  0  0  0  0  0  0
    1.3856    2.1862    0.0000 O   0  0  0  0  0  0  0  0  0  0  0  0
    0.6711    3.4238    0.0000 N   0  0  0  0  0  0  0  0  0  0  0  0
   -0.0433    3.0113    0.0000 C   0  0  0  0  0  0  0  0  0  0  0  0
   -0.7578    3.4238    0.0000 C   0  0  0  0  0  0  0  0  0  0  0  0
   -1.4723    3.0113    0.0000 C   0  0  0  0  0  0  0  0  0  0  0  0
   -1.4723    2.1862    0.0000 C   0  0  0  0  0  0  0  0  0  0  0  0
    2.1001    4.2488    0.0000 N   0  0  0  0  0  0  0  0  0  0  0  0
   -2.1867    3.4238    0.0000 C   0  0  0  0  0  0  0  0  0  0  0  0
   -2.9012    3.0113    0.0000 C   0  0  0  0  0  0  0  0  0  0  0  0
   -2.9012    2.1862    0.0000 C   0  0  0  0  0  0  0  0  0  0  0  0
   -2.1867    1.7737    0.0000 C   0  0  0  0  0  0  0  0  0  0  0  0
   -3.3137    1.4718    0.0000 O   0  0  0  0  0  0  0  0  0  0  0  0
   -2.1867    0.9487    0.0000 H   0  0  0  0  0  0  0  0  0  0  0  0
   -3.6157    3.4238    0.0000 H   0  0  0  0  0  0  0  0  0  0  0  0
    0.6711    4.2488    0.0000 H   0  0  0  0  0  0  0  0  0  0  0  0
    2.8146    4.6612    0.0000 O   0  0  0  0  0  0  0  0  0  0  0  0
  1  2  1  0      
  2  3  1  0      
  3  4  1  0      
  4  5  2  0      
  4  6  1  0      
  6  7  1  0      
  7  8  1  0      
  8  9  2  0      
  8 10  1  0      
 10 11  2  0      
 11 12  1  0      
 12 13  2  0      
 13  9  1  0      
 14 15  1  0      
 15 16  2  0      
 16 17  1  0      
 17 18  2  0      
 18 19  1  0      
 19 14  2  0      
 15 20  1  0      
 12 20  1  0      
 11 21  1  0      
 16 22  1  0      
 17 23  1  0      
 13 24  1  0      
  3 25  1  0      
  6 26  2  0      
 26 27  1  0      
  1 28  1  0      
 28 29  1  0      
 29 30  2  0      
 30 31  1  0      
 31 32  2  0      
 32 33  1  0      
 33 28  2  0      
 31 34  1  0      
 32 35  1  0      
 19 36  1  0      
 36 37  1  0      
 37 38  1  0      
 38 39  2  0      
 38 40  1  0      
 40 41  1  0      
 41 42  1  0      
 42 43  1  0      
 43 44  1  0      
 37 45  2  0      
 43 46  2  0      
 46 47  1  0      
 47 48  2  0      
 48 49  1  0      
 49 44  2  0      
 48 50  1  0      
 50 30  1  0      
 49 51  1  0      
 47 52  1  0      
 40 53  1  0      
 45 54  1  0      
M  END
