# Supplementary material for: Brominated Skeletal Components of the Marine Demosponges, Aplysina cavernicola and Ianthella basta: Analytical and Biochemical Investigations
Source: Mar Drugs. 2013 Apr 17;11(4):1271–87. doi: 10.3390/md11041271 (PMC3705403; doi:10.3390/md11041271)
Supplement: Supplementary File 1 — Supporting Information (PDF, 1009 KB) [file marinedrugs-11-01271-s001.pdf]

# Supporting Information

**Table S1.** Assignment of the IR bands in Figure 3 and Figure S1 (below).

| <i>A. cavernicola</i><br>(H <sub>2</sub> O/TE100) |                    | <i>A. cavernicola</i><br>(NaOH) | <i>I. basta</i><br>(H <sub>2</sub> O/TE100) |                    | <i>I. basta</i><br>(NaOH)       | $\alpha$ -chitin                | Assignment                                 |
|---------------------------------------------------|--------------------|---------------------------------|---------------------------------------------|--------------------|---------------------------------|---------------------------------|--------------------------------------------|
| Wavenumber/<br>cm <sup>-1</sup>                   |                    | Wavenumber/<br>cm <sup>-1</sup> | Wavenumber/<br>cm <sup>-1</sup>             |                    | Wavenumber/<br>cm <sup>-1</sup> | Wavenumber/<br>cm <sup>-1</sup> |                                            |
|                                                   |                    | 898                             |                                             |                    | 897                             | 898                             | CH <sub>x</sub><br>deformation<br>(o.o.p.) |
|                                                   |                    |                                 |                                             | 921                |                                 | 920                             |                                            |
|                                                   |                    | 949                             |                                             |                    | 950                             | 953                             |                                            |
| 1033                                              |                    | 1027                            | 1037                                        |                    | 1029                            | 1025                            | C-O-C/C-O<br>stretching                    |
| 1072                                              | 1069               | 1065                            | 1068                                        | 1063               | 1068                            | 1071                            |                                            |
| 1111                                              | 1108               | 1109                            | 1111                                        | 1118               | 1112                            | 1113                            |                                            |
|                                                   |                    | 1154                            | 1155                                        | 1156               | 1155                            | 1155                            |                                            |
|                                                   |                    | 1203                            |                                             |                    | 1203                            | 1205                            | Amide III                                  |
| 1234                                              | 1235               |                                 | 1233                                        |                    |                                 |                                 |                                            |
|                                                   |                    | 1263                            |                                             | 1255               | 1262                            | 1260                            |                                            |
| 1316                                              | 1314               | 1306                            |                                             | 1325               | 1306                            | 1309                            |                                            |
|                                                   | 1380               | 1374                            | 1376                                        |                    | 1375                            | 1376                            | CH <sub>x</sub><br>deformation             |
|                                                   |                    |                                 |                                             | 1398               |                                 | 1415                            |                                            |
| 1447                                              | 1445               | 1429                            | 1447                                        |                    | 1430                            | 1430                            |                                            |
| 1519                                              | 1515               | 1550                            | 1522                                        | 1588               | 1554                            | 1554                            | Amide II                                   |
| 1634                                              | 1639               |                                 | 1638                                        |                    | 1631                            | 1622                            | Amide I                                    |
|                                                   |                    | 1642                            |                                             |                    | 1653                            | 1654                            |                                            |
| 2876<br>(shoulder)                                | 2876<br>(shoulder) | 2875                            | 2876<br>(shoulder)                          | 2875<br>(shoulder) | 2874                            | 2876                            | CH <sub>x</sub><br>stretching              |
| 2931                                              | 2933               | 2930                            | 2929                                        |                    | 2923                            | 2927                            |                                            |
| 2958                                              |                    |                                 |                                             | 2957               | 2955                            | 2959                            |                                            |
|                                                   |                    | 3096                            |                                             |                    |                                 |                                 | N-H<br>stretching                          |
|                                                   |                    | 3121                            |                                             |                    | 3114                            | 3103                            |                                            |
| 3277                                              | 3285               | 3283                            | 3279                                        | 3270               | 3285                            | 3262                            |                                            |
|                                                   |                    | 3409                            |                                             |                    | 3436                            | 3432                            | O-H<br>stretching                          |

**Figure S1.** ATR FTIR spectra of the purified skeletons of *I. basta* after different treatment steps.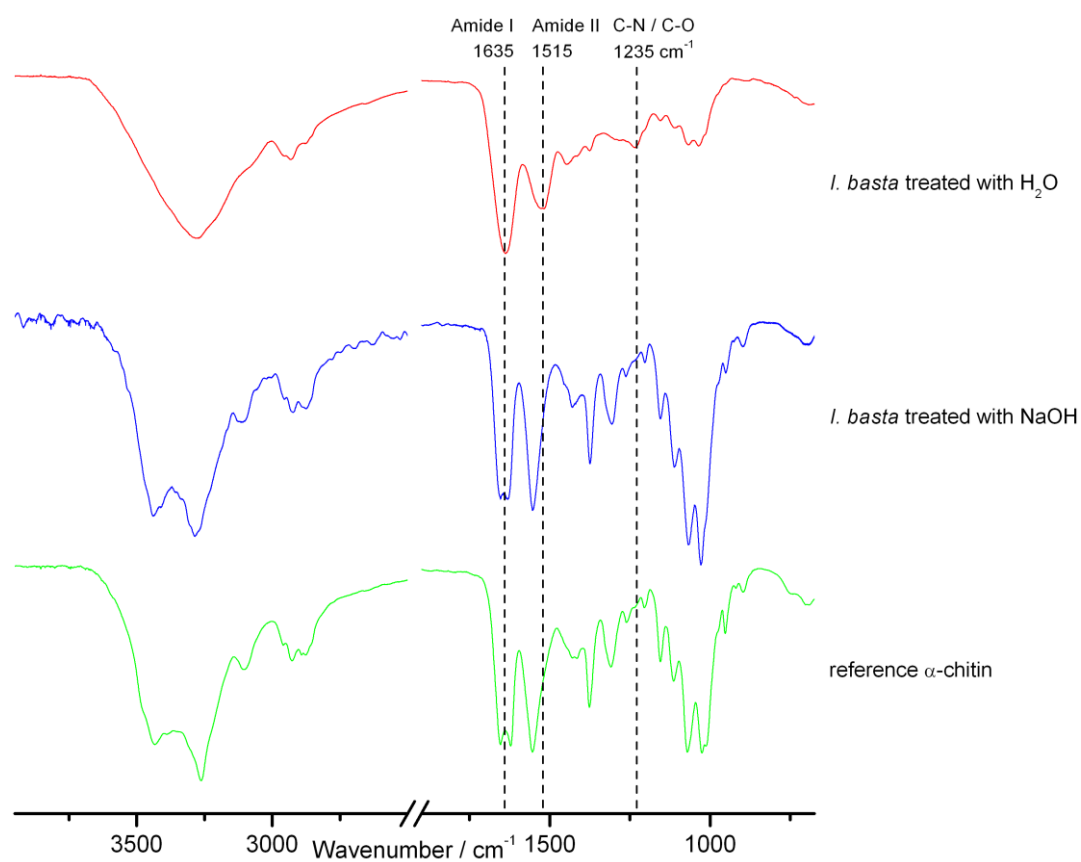

**Figure S2.**  $^{13}\text{C}\{^1\text{H}\}$  CP MAS NMR spectrum and structure of aerothionin as well as assignment table of the observed  $^{13}\text{C}$  NMR signals. This symmetric molecule exhibits two pairwise identical carbon positions (e.g., 1 and 1') which exhibit identical chemical shifts in the liquid-state NMR spectra [1]. The observation of two signals in the solid-state NMR spectrum indicates the presence of two crystallographically different positions for solid aerothionin. \* denotes spinning sidebands.

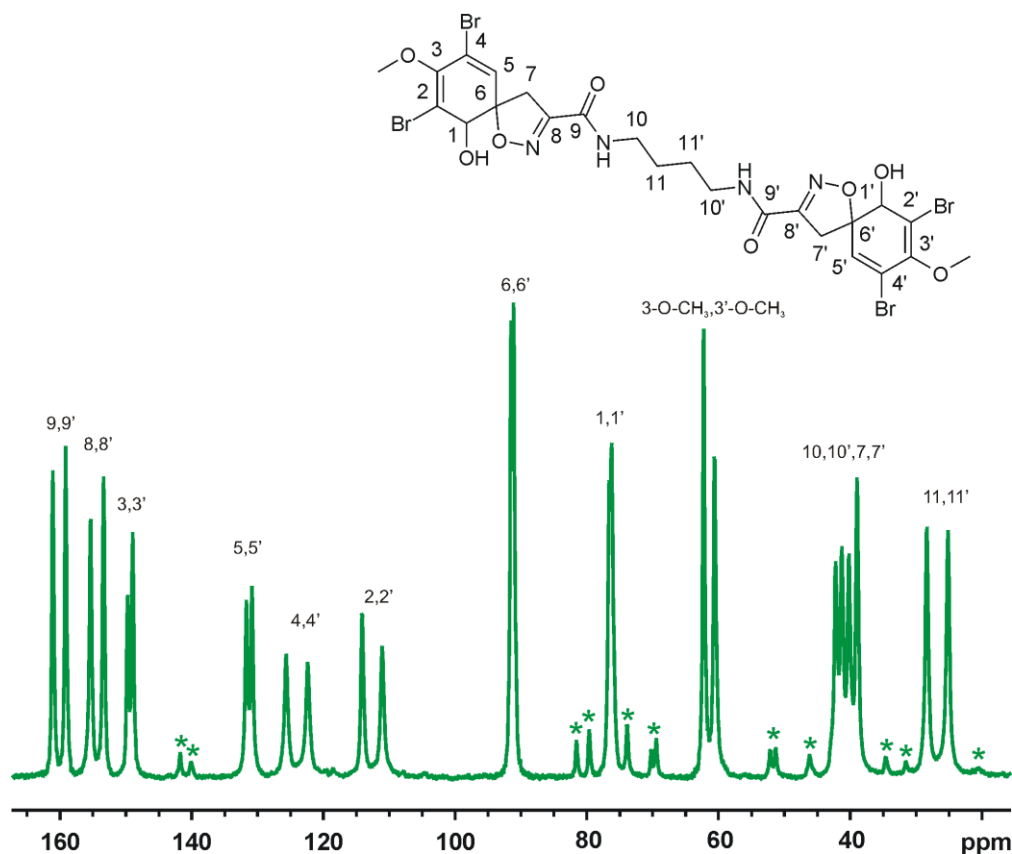

| $^{13}\text{C}$ NMR signal/ppm | Assignment                                |
|--------------------------------|-------------------------------------------|
| 25; 28                         | 11/11'                                    |
| 39; 40; 41; 42                 | 7/7'/10/10'                               |
| 61; 62                         | 3-O-CH <sub>3</sub> /3'-O-CH <sub>3</sub> |
| 76; 77                         | 1/1'                                      |
| 91; 92                         | 6/6'                                      |
| 111; 114                       | 2/2'                                      |
| 122; 126                       | 4/4'                                      |
| 131; 132                       | 5/5'                                      |
| 149; 150                       | 3/3'                                      |
| 153; 155                       | 8/8'                                      |
| 159; 161                       | 9/9'                                      |

**Figure S3.**  $^{13}\text{C}\{^1\text{H}\}$  CP MAS NMR spectra of the skeletons of *I. basta* after TE100 treatment. For comparison, the spectra of the pure chitin-scaffold obtained after NaOH treatment and of synthetic 5,5'-dibromohemibastadin-1 are also shown. For signal assignments see Figure 4 and Figure S4. \* denotes spinning sidebands.

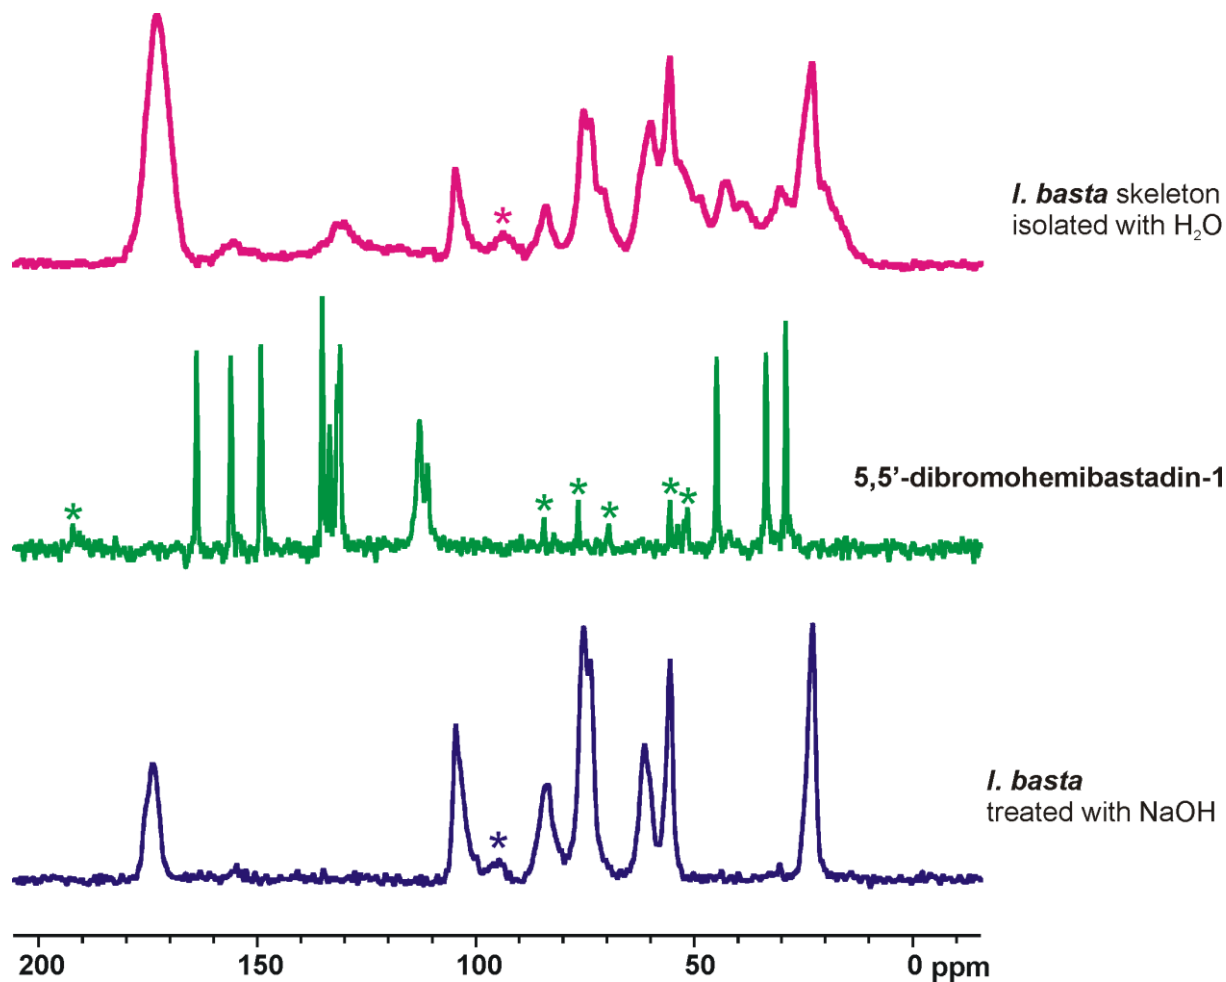

**Figure S4.**  $^{13}\text{C}\{^1\text{H}\}$  CP MAS NMR spectrum, structure of 5,5'-dibromohemibastadin-1 and assignment table of the  $^{13}\text{C}$  NMR signals. \* denotes spinning sidebands.

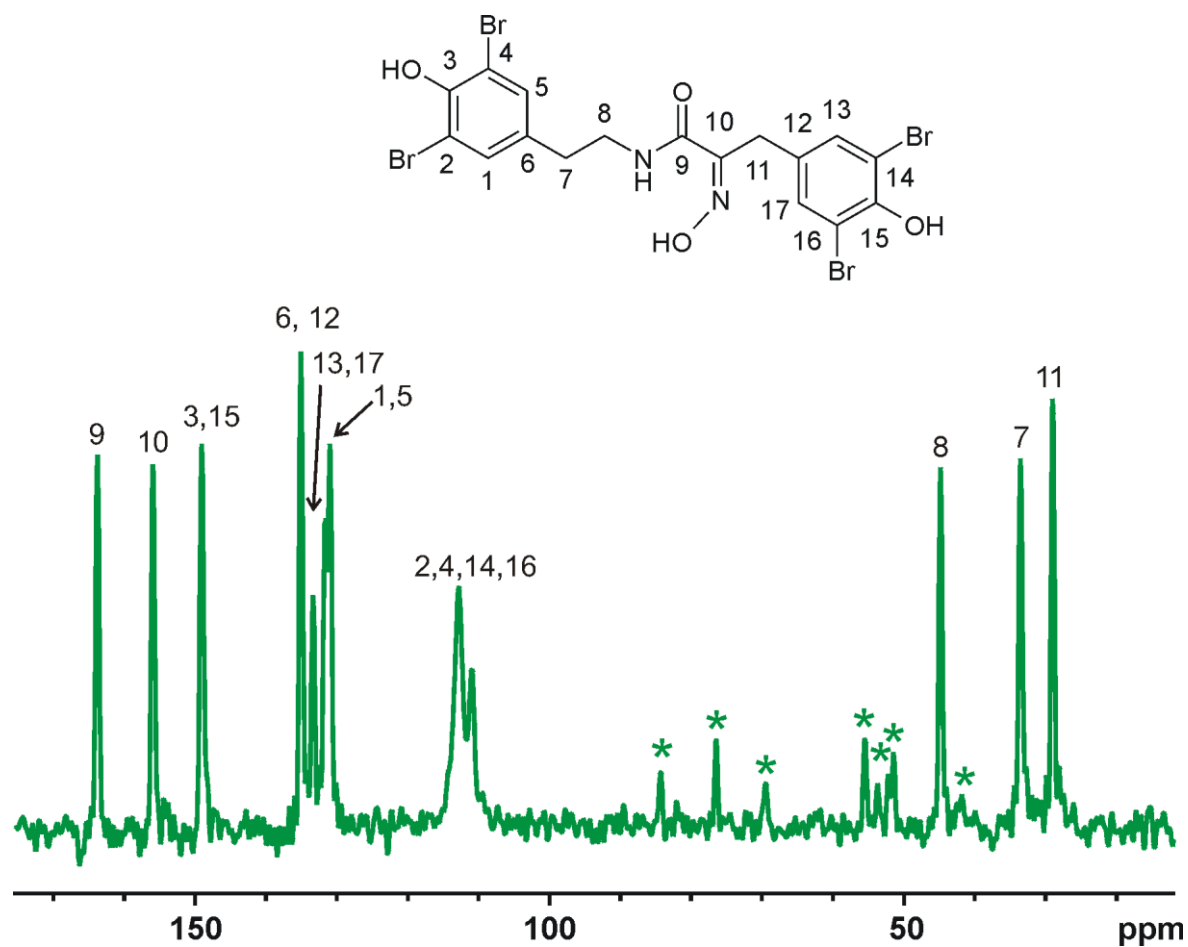

| $^{13}\text{C}$ NMR signal/ppm | Assignment |
|--------------------------------|------------|
| 29                             | 11         |
| 36                             | 7          |
| 45                             | 8          |
| 111; 113                       | 2/4/14/16  |
| 131; 132                       | 1/5        |
| 133                            | 13/17      |
| 135                            | 6/12       |
| 149                            | 3/15       |
| 156                            | 10         |
| 163                            | 9          |

**Figure S5.** ATR FTIR spectra of the purified skeletons of *A. cavernicola* and *I. basta* before and after the MeOH extraction.

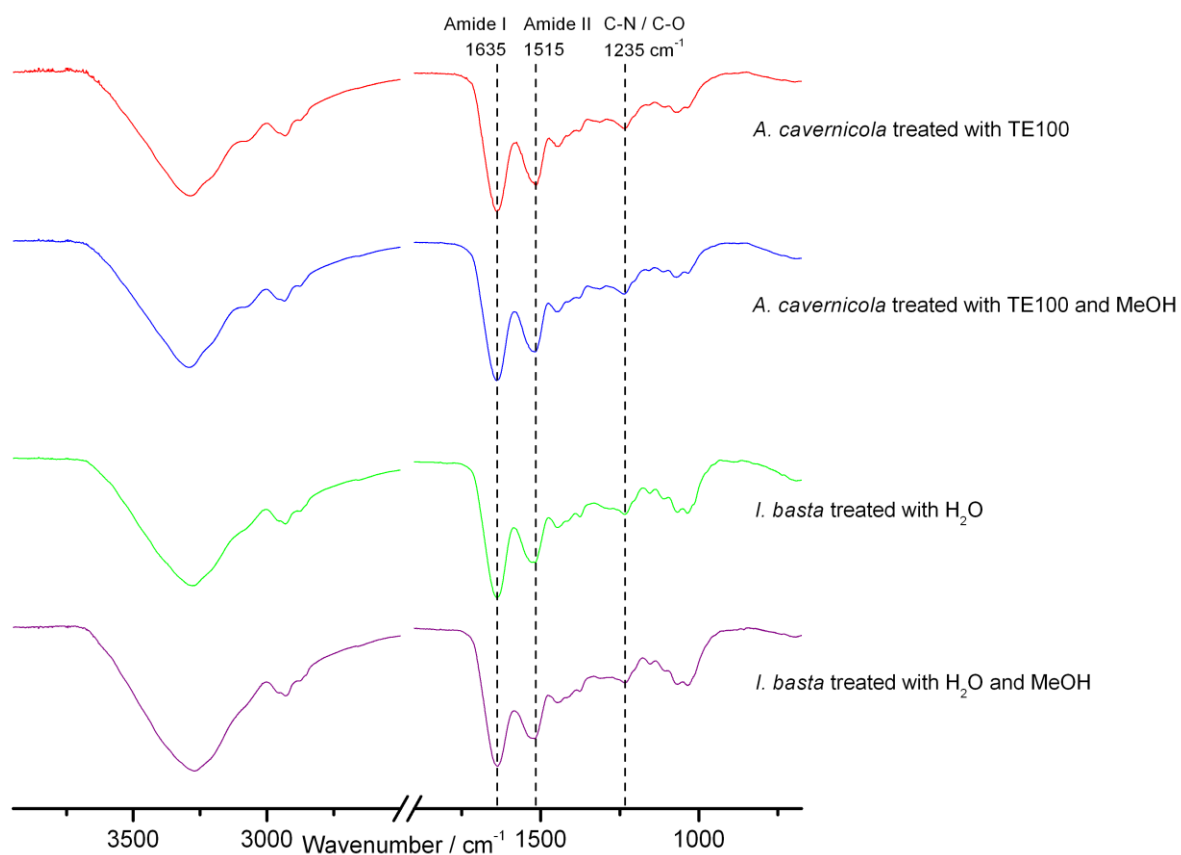

**Figure S6.**  $^{13}\text{C}\{^1\text{H}\}$  CP MAS NMR spectra of the purified skeletons of *A. cavernicola* and *I. basta* before and after the MeOH extraction.

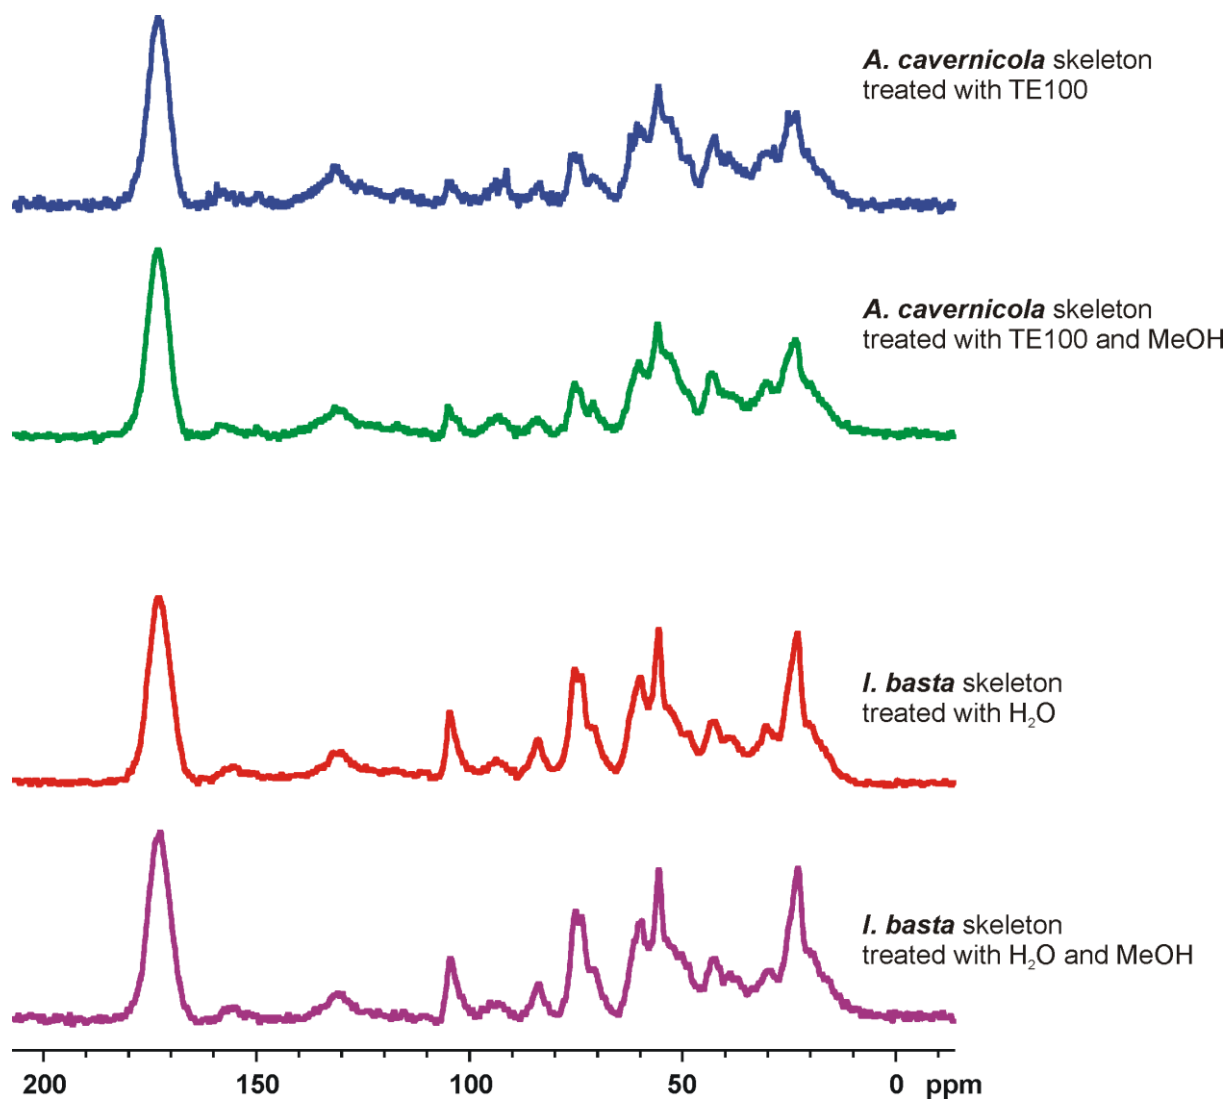

**Figure S7.** Selected region from the  $^{13}\text{C}\{^1\text{H}\}$  CP MAS NMR spectra of the purified skeletons of *A. cavernicola* before and after MeOH extraction and of arothionin. Note the presence of weak, characteristic signals due to arothionin before MeOH extraction which disappear after MeOH treatment.

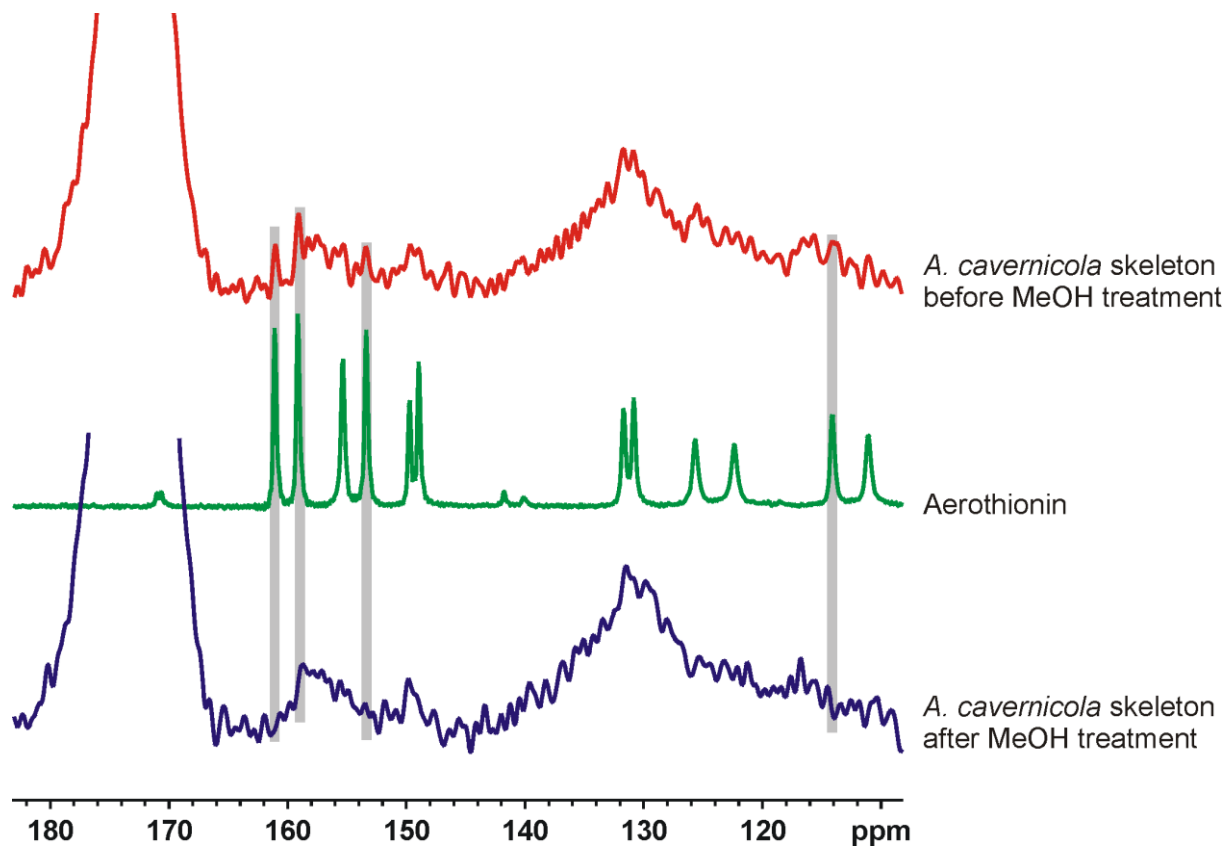

**Figure S8.** Chemical structures of bromotyrosines identified in the skeleton extracts; **(A)** bastadins 3, 4, 6, 7, 9 and 16 from *I. basta*; **(B)** aerothionin from *A. cavernicola*.

**A**

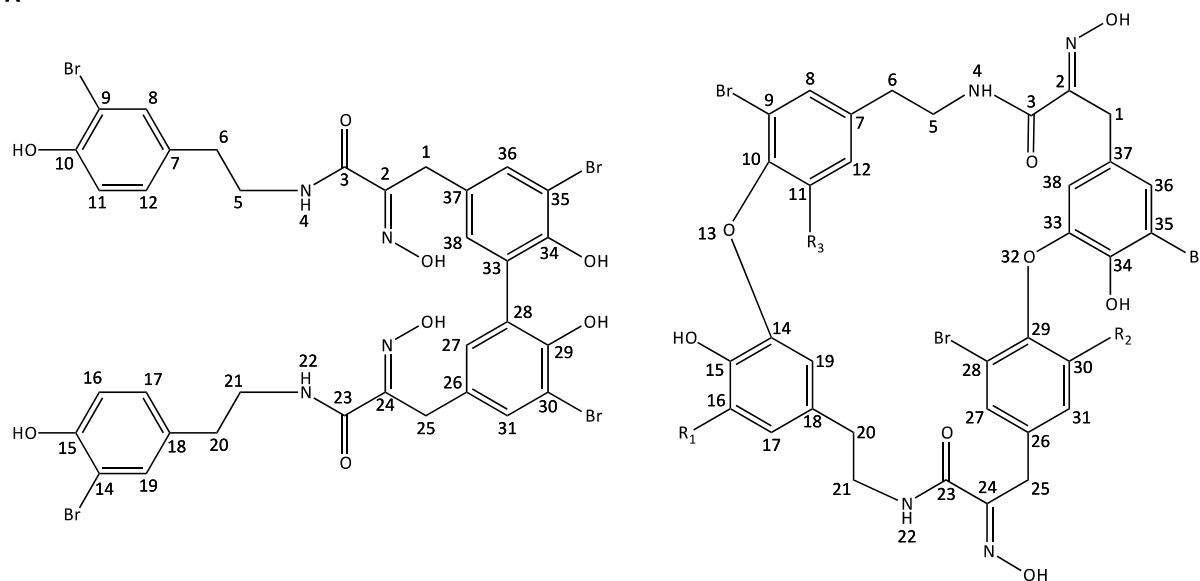

bastadin 3

bastadin 4:  $R_1 = R_2 = \text{Br}$ ,  $R_3 = \text{H}$ ,  $\Delta^{5,6}$   
 bastadin 6:  $R_1 = R_2 = R_3 = \text{Br}$   
 bastadin 7:  $R_1 = \text{Br}$ ,  $R_2 = R_3 = \text{H}$ ,  $\Delta^{5,6}$   
 bastadin 9:  $R_1 = R_3 = \text{H}$ ,  $R_2 = \text{Br}$   
 bastadin 16:  $R_1 = \text{H}$ ,  $R_2 = R_3 = \text{Br}$

**B**

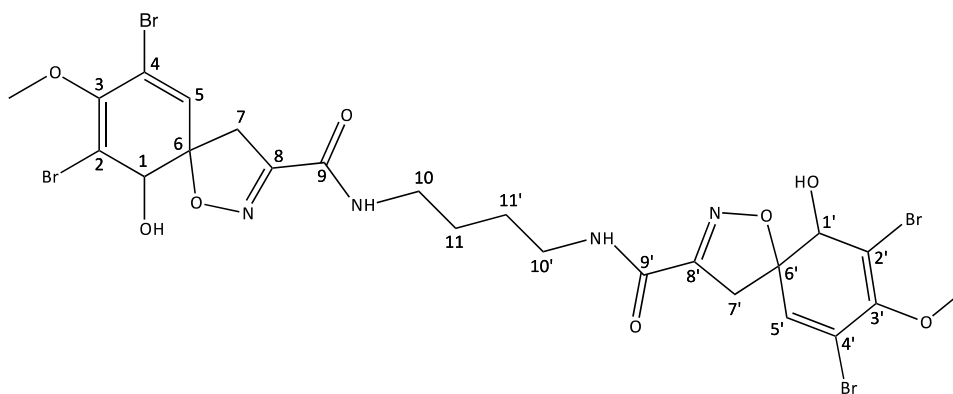

aerothionin

**Figure S9.** (A) Direct injection-ESI-mass spectrum of pure bastadin 3 standard obtained from *I. basta* tissue extract; (B) LC-ESI-mass spectrum obtained from a constituent of the *I. basta* skeleton extract. Based on this mass spectrum, this compound was identified as bastadin 3.

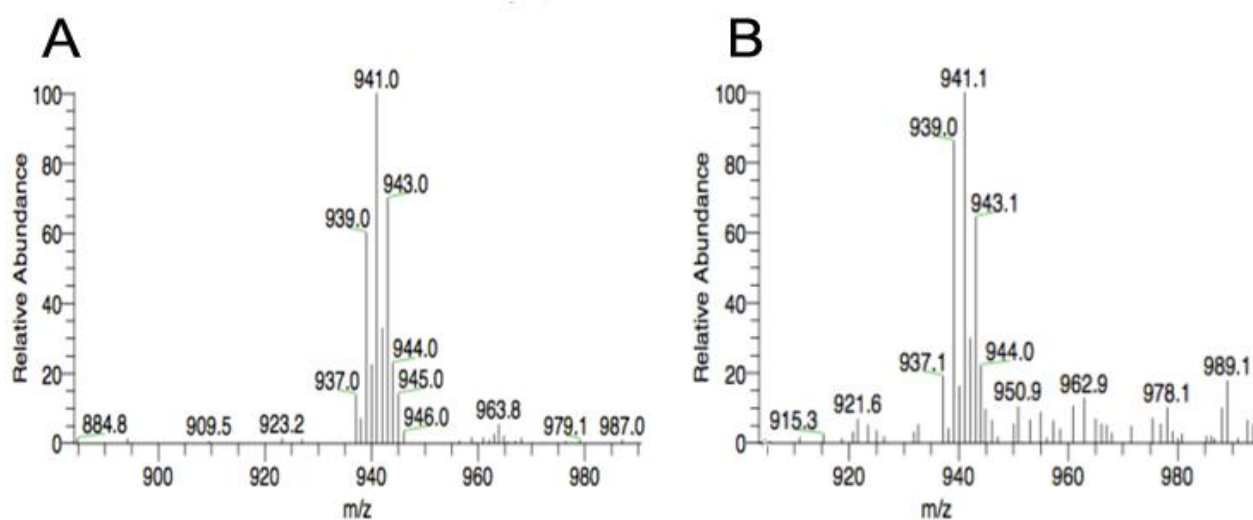

**Figure S10.** Removal of contaminating pigments (2) from the DNA (1) isolated from bacteria associated with *A. cavernicola*.

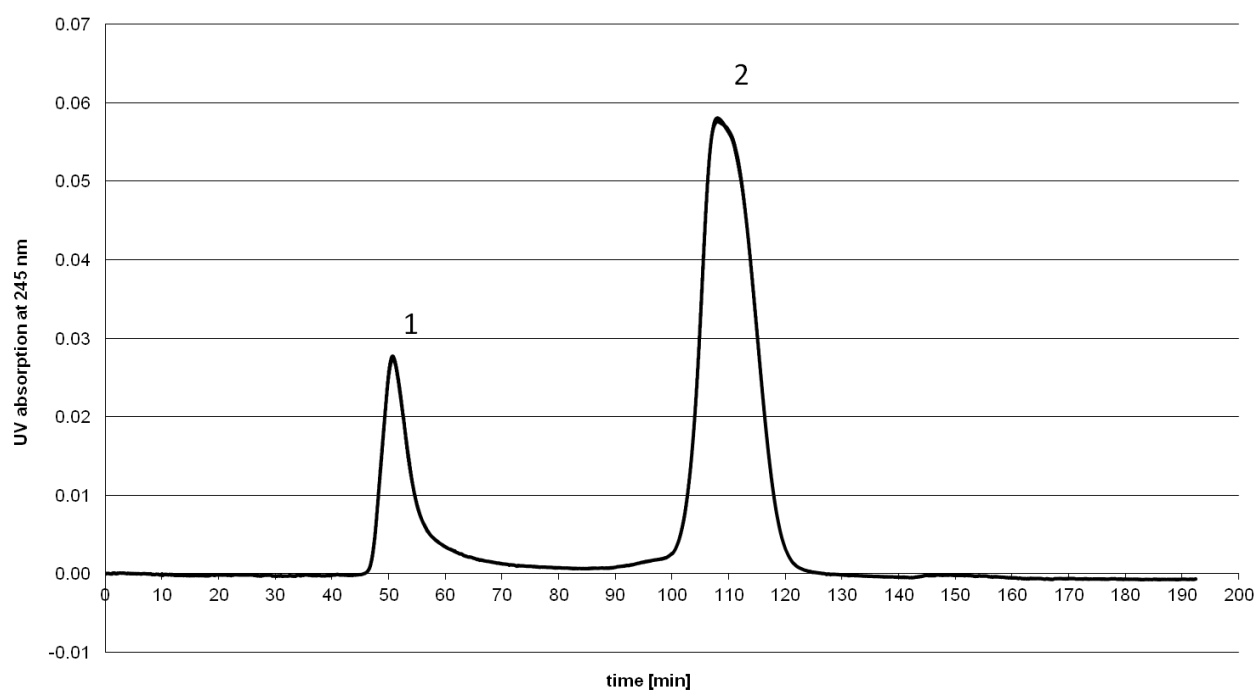

**Table S2.** Gradient systems for HPLC analysis of *I. basta* and *A. cavernicola*; eluent A: 0.1% formic acid in water, eluent B: MeOH.

| <i>I. basta</i> |              |              | <i>A. cavernicola</i> |              |              |
|-----------------|--------------|--------------|-----------------------|--------------|--------------|
| time [min]      | eluent A [%] | eluent B [%] | time [min]            | eluent A [%] | eluent B [%] |
| 0               | 60           | 40           | 0                     | 90           | 10           |
| 5               | 60           | 40           | 5                     | 90           | 10           |
| 34              | 25           | 75           | 35                    | 0            | 100          |
| 35              | 0            | 100          | 45                    | 0            | 100          |
| 50              | 90           | 10           | 50                    | 90           | 10           |
| 60              | 90           | 10           | 60                    | 90           | 10           |

**Figure S11.** Calibration graph of bastadin 3 for external standard quantification of bastadin derivatives in MeOH-extracts of sponge tissue and skeleton.

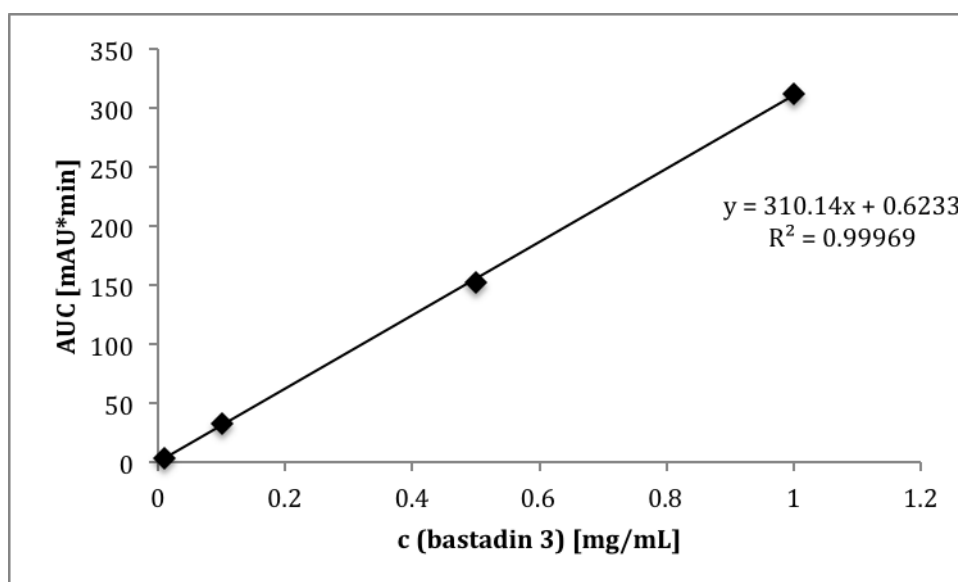

**Figure S12.** Potentiometric titration curves for quantitative bromine determination in *A. cavernicola* skeleton samples before and after MeOH-extraction. The step in the titration curve represents the bromide ions. The bromine concentration can be determined from the  $\text{AgNO}_3$  concentration at the inflection point of this potential step.

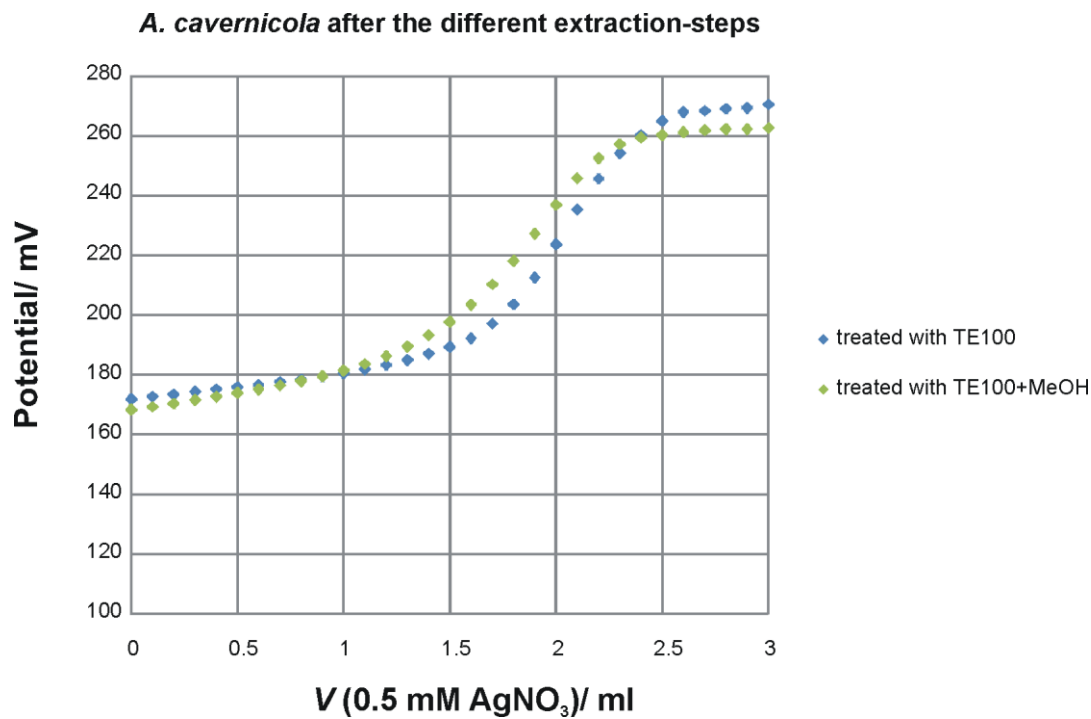

## References

1. Kalaitzis, J.A.; Davis, R.A.; Quinn, R.J. Unequivocal  $^{13}\text{C}$  NMR assignment of cyclohexadienyl rings in bromotyrosine-derived metabolites from marine sponges. *Magn. Reson. Chem.* **2012**, *50*, 749–754.
